# Supplementary material
Source: HighWire-hosted journal article supplement (https://www.cmajopen.ca/highwire/filestream/81269/field_highwire_adjunct_files/1/2019-0007-original-submission.pdf)
Supplement: 2019-0007-original-submission.pdf [file 2019-0007-original-submission.pdf]

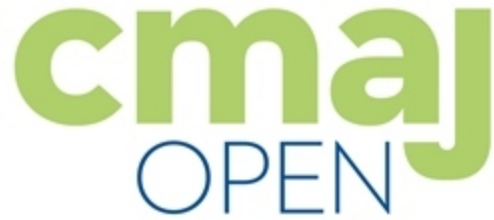

**Clinical and Sociodemographic Profile of Older Adults Cared for by Nurse Practitioners Compared to Family Physicians in Ontario, 2000-2015: A Descriptive Retrospective Cohort Study**

|                               |                                                                                                                                                                                                                                                                                                                                                                                                                                                                                                                                                                                                                                                                                                                                                                                                                                                                                                                                                                                                                                                                                                                                                                                                                                                                                                                                                                                                                                                                                                                                                  |
|-------------------------------|--------------------------------------------------------------------------------------------------------------------------------------------------------------------------------------------------------------------------------------------------------------------------------------------------------------------------------------------------------------------------------------------------------------------------------------------------------------------------------------------------------------------------------------------------------------------------------------------------------------------------------------------------------------------------------------------------------------------------------------------------------------------------------------------------------------------------------------------------------------------------------------------------------------------------------------------------------------------------------------------------------------------------------------------------------------------------------------------------------------------------------------------------------------------------------------------------------------------------------------------------------------------------------------------------------------------------------------------------------------------------------------------------------------------------------------------------------------------------------------------------------------------------------------------------|
| Journal:                      | <i>CMAJ Open</i>                                                                                                                                                                                                                                                                                                                                                                                                                                                                                                                                                                                                                                                                                                                                                                                                                                                                                                                                                                                                                                                                                                                                                                                                                                                                                                                                                                                                                                                                                                                                 |
| Manuscript ID                 | CMAJOpen-2019-0007                                                                                                                                                                                                                                                                                                                                                                                                                                                                                                                                                                                                                                                                                                                                                                                                                                                                                                                                                                                                                                                                                                                                                                                                                                                                                                                                                                                                                                                                                                                               |
| Manuscript Type:              | Cohort (retrospective)                                                                                                                                                                                                                                                                                                                                                                                                                                                                                                                                                                                                                                                                                                                                                                                                                                                                                                                                                                                                                                                                                                                                                                                                                                                                                                                                                                                                                                                                                                                           |
| Date Submitted by the Author: | 12-Jan-2019                                                                                                                                                                                                                                                                                                                                                                                                                                                                                                                                                                                                                                                                                                                                                                                                                                                                                                                                                                                                                                                                                                                                                                                                                                                                                                                                                                                                                                                                                                                                      |
| Complete List of Authors:     | Edge, Dana; Queen's University, School of Nursing<br>Tranmer, Joan; Queen's University, Nursing<br>Wei, Xuejiao<br>VandenKerkof, Elizabeth; Queen's University, School of Nursing                                                                                                                                                                                                                                                                                                                                                                                                                                                                                                                                                                                                                                                                                                                                                                                                                                                                                                                                                                                                                                                                                                                                                                                                                                                                                                                                                                |
| More Detailed Keywords:       | Primary care, Nurse practitioner                                                                                                                                                                                                                                                                                                                                                                                                                                                                                                                                                                                                                                                                                                                                                                                                                                                                                                                                                                                                                                                                                                                                                                                                                                                                                                                                                                                                                                                                                                                 |
| Keywords:                     | Health services research, Nursing                                                                                                                                                                                                                                                                                                                                                                                                                                                                                                                                                                                                                                                                                                                                                                                                                                                                                                                                                                                                                                                                                                                                                                                                                                                                                                                                                                                                                                                                                                                |
| Abstract:                     | <p><b>Background.</b> Nurse practitioners (NPs) are an integral component of healthcare delivery in Ontario. In comparison to family physicians (FPs) there is a poor understanding, at a population level, of patients in NPs'practices. To address this knowledge gap, we used Ontario administrative databases to identify the sociodemographic characteristics and co-morbidities of patients 65 years and older cared for by NPs and FPs between 2000 and 2015.</p> <p><b>Methods.</b> This population-based descriptive retrospective cohort study included patients <math>\geq 65</math> years with Ontario Health Insurance Plan (OHIP) eligibility and at least one prescription encounter with a NP or FP during the study period. Prescription identification of patients permitted their characterization by age, sex, geographical location, rurality, neighbourhood income, and comorbidities. Patients were categorized as having NP, FP or shared care based on the percentage of patient prescription encounters with NPs versus FPs.</p> <p><b>Results.</b> By 2015, older patients cared for by NPs were female (59%) and residents of low-income neighbourhoods (44%) living outside of central Ontario. In contrast, patients cared for by FPs were older and residents of higher income and urban areas. Elixhauser comorbidity scores were consistently lower among patients cared for by NPs than those predominantly seen by FPs. Most prevalent conditions were hypertension and diabetes, regardless of provider.</p> |

1  
2  
3  
4  
5  
6  
7  
8  
9  
10  
11  
12  
13  
14  
15  
16  
17  
18  
19  
20  
21  
22  
23  
24  
25  
26  
27  
28  
29  
30  
31  
32  
33  
34  
35  
36  
37  
38  
39  
40  
41  
42  
43  
44  
45  
46  
47  
48  
49  
50  
51  
52  
53  
54  
55  
56  
57  
58  
59  
60

|  |                                                                                                                                                                                                                                                                                                                                                              |
|--|--------------------------------------------------------------------------------------------------------------------------------------------------------------------------------------------------------------------------------------------------------------------------------------------------------------------------------------------------------------|
|  | <p><b>Interpretation.</b> Patient comorbidities did not vary substantially between provider groups. The patient characteristic with highest variability between providers was geographical residence in the province. Elucidating patterns of care is critical for primary care policy; our results provide baseline data for future healthcare planning</p> |
|  |                                                                                                                                                                                                                                                                                                                                                              |

SCHOLARONE™  
Manuscripts

STROBE Statement—Checklist of items that should be included in reports of *cohort studies*

|                              | Item No | Recommendation                                                                                                                                                                                    | Page No         |
|------------------------------|---------|---------------------------------------------------------------------------------------------------------------------------------------------------------------------------------------------------|-----------------|
| <b>Title and abstract</b>    | 1       | (a) Indicate the study's design with a commonly used term in the title or the abstract                                                                                                            | 1               |
|                              |         | (b) Provide in the abstract an informative and balanced summary of what was done and what was found                                                                                               | 2               |
| <b>Introduction</b>          |         |                                                                                                                                                                                                   |                 |
| Background/rationale         | 2       | Explain the scientific background and rationale for the investigation being reported                                                                                                              | 3-4             |
| Objectives                   | 3       | State specific objectives, including any prespecified hypotheses                                                                                                                                  | 4               |
| <b>Methods</b>               |         |                                                                                                                                                                                                   |                 |
| Study design                 | 4       | Present key elements of study design early in the paper                                                                                                                                           | 4               |
| Setting                      | 5       | Describe the setting, locations, and relevant dates, including periods of recruitment, exposure, follow-up, and data collection                                                                   | 4-5             |
| Participants                 | 6       | (a) Give the eligibility criteria, and the sources and methods of selection of participants. Describe methods of follow-up                                                                        | 5               |
|                              |         | (b) For matched studies, give matching criteria and number of exposed and unexposed                                                                                                               | n/a             |
| Variables                    | 7       | Clearly define all outcomes, exposures, predictors, potential confounders, and effect modifiers. Give diagnostic criteria, if applicable                                                          | 5-6             |
| Data sources/<br>measurement | 8*      | For each variable of interest, give sources of data and details of methods of assessment (measurement). Describe comparability of assessment methods if there is more than one group              | 4-5             |
| Bias                         | 9       | Describe any efforts to address potential sources of bias                                                                                                                                         | 10              |
| Study size                   | 10      | Explain how the study size was arrived at                                                                                                                                                         | n/a             |
| Quantitative variables       | 11      | Explain how quantitative variables were handled in the analyses. If applicable, describe which groupings were chosen and why                                                                      | 5               |
| Statistical methods          | 12      | (a) Describe all statistical methods, including those used to control for confounding                                                                                                             | 6               |
|                              |         | (b) Describe any methods used to examine subgroups and interactions                                                                                                                               | n/a             |
|                              |         | (c) Explain how missing data were addressed                                                                                                                                                       | n/a             |
|                              |         | (d) If applicable, explain how loss to follow-up was addressed                                                                                                                                    | n/a             |
|                              |         | (e) Describe any sensitivity analyses                                                                                                                                                             | n/a             |
| <b>Results</b>               |         |                                                                                                                                                                                                   |                 |
| Participants                 | 13*     | (a) Report numbers of individuals at each stage of study—eg numbers potentially eligible, examined for eligibility, confirmed eligible, included in the study, completing follow-up, and analysed | Fig.1<br>Tabl.1 |
|                              |         | (b) Give reasons for non-participation at each stage                                                                                                                                              | n/a             |
|                              |         | (c) Consider use of a flow diagram                                                                                                                                                                | 20              |
| Descriptive data             | 14*     | (a) Give characteristics of study participants (eg demographic, clinical, social) and information on exposures and potential confounders                                                          | 6-7             |
|                              |         | (b) Indicate number of participants with missing data for each variable of interest                                                                                                               |                 |
|                              |         | (c) Summarise follow-up time (eg, average and total amount)                                                                                                                                       |                 |
| Outcome data                 | 15*     | Report numbers of outcome events or summary measures over time                                                                                                                                    | 6-7             |

|    |                          |    |                                                                                                                                                                                                              |      |
|----|--------------------------|----|--------------------------------------------------------------------------------------------------------------------------------------------------------------------------------------------------------------|------|
| 1  | Main results             | 16 | (a) Give unadjusted estimates and, if applicable, confounder-adjusted estimates and their precision (eg, 95% confidence interval). Make clear which confounders were adjusted for and why they were included | n/a  |
| 2  |                          |    | (b) Report category boundaries when continuous variables were categorized                                                                                                                                    |      |
| 3  |                          |    | (c) If relevant, consider translating estimates of relative risk into absolute risk for a meaningful time period                                                                                             |      |
| 4  |                          |    |                                                                                                                                                                                                              |      |
| 5  |                          |    |                                                                                                                                                                                                              |      |
| 6  |                          |    |                                                                                                                                                                                                              |      |
| 7  |                          |    |                                                                                                                                                                                                              |      |
| 8  |                          |    |                                                                                                                                                                                                              |      |
| 9  | Other analyses           | 17 | Report other analyses done—eg analyses of subgroups and interactions, and sensitivity analyses                                                                                                               | n/a  |
| 10 |                          |    |                                                                                                                                                                                                              |      |
| 11 | <b>Discussion</b>        |    |                                                                                                                                                                                                              |      |
| 12 |                          |    |                                                                                                                                                                                                              |      |
| 13 | Key results              | 18 | Summarise key results with reference to study objectives                                                                                                                                                     | 9-10 |
| 14 | Limitations              | 19 | Discuss limitations of the study, taking into account sources of potential bias or imprecision. Discuss both direction and magnitude of any potential bias                                                   | 10   |
| 15 |                          |    |                                                                                                                                                                                                              |      |
| 16 | Interpretation           | 20 | Give a cautious overall interpretation of results considering objectives, limitations, multiplicity of analyses, results from similar studies, and other relevant evidence                                   | 9-11 |
| 17 |                          |    |                                                                                                                                                                                                              |      |
| 18 |                          |    |                                                                                                                                                                                                              |      |
| 19 | Generalisability         | 21 | Discuss the generalisability (external validity) of the study results                                                                                                                                        | 11   |
| 20 |                          |    |                                                                                                                                                                                                              |      |
| 21 | <b>Other information</b> |    |                                                                                                                                                                                                              |      |
| 22 | Funding                  | 22 | Give the source of funding and the role of the funders for the present study and, if applicable, for the original study on which the present article is based                                                | 11   |
| 23 |                          |    |                                                                                                                                                                                                              |      |
| 24 |                          |    |                                                                                                                                                                                                              |      |

\*Give information separately for exposed and unexposed groups.

**Note:** An Explanation and Elaboration article discusses each checklist item and gives methodological background and published examples of transparent reporting. The STROBE checklist is best used in conjunction with this article (freely available on the Web sites of PLoS Medicine at <http://www.plosmedicine.org/>, Annals of Internal Medicine at <http://www.annals.org/>, and Epidemiology at <http://www.epidem.com/>). Information on the STROBE Initiative is available at <http://www.strobe-statement.org>.

Running head: SOCIODEMOGRAPHIC PROFILE OF OLDER ADULTS

1  
2  
3  
4  
5  
6  
7  
8  
9  
10  
11  
12  
13  
14  
15  
16  
17  
18  
19  
20  
21  
22  
23  
24  
25  
26  
27  
28  
29  
30  
31  
32  
33  
34  
35  
36  
37  
38  
39  
40  
41  
42  
43  
44  
45  
46  
47  
48  
49  
50  
51  
52  
53  
54  
55  
56  
57  
58  
59  
60

Clinical and Sociodemographic Profile of Older Adults Cared for by Nurse Practitioners

Compared to Family Physicians in Ontario, 2000-2015:

A Descriptive Retrospective Cohort Study

Dana S. Edge, RN, PhD

Joan E. Tranmer, RN, PhD

Xuejiao Wei, MSc

Elizabeth G. VanDenKerkhof, RN, DrPH

**ABSTRACT****Clinical and Sociodemographic Profile of Older Adults Cared for by Nurse Practitioners Compared to Family Physicians in Ontario, 2000-2015: A Retrospective Cohort Study**

**Background.** Nurse practitioners (NPs) are an integral component of healthcare delivery in Ontario. In comparison to family physicians (FPs) there is a poor understanding, at a population level, of patients in NPs' practices. To address this knowledge gap, we used Ontario administrative databases to identify the sociodemographic characteristics and co-morbidities of patients 65 years and older cared for by NPs and FPs between 2000 and 2015.

**Methods.** This population-based descriptive retrospective cohort study included patients  $\geq 65$  years with Ontario Health Insurance Plan (OHIP) eligibility and at least one prescription encounter with a NP or FP during the study period. Prescription identification of patients permitted their characterization by age, sex, geographical location, rurality, neighbourhood income, and comorbidities. Patients were categorized as having NP, FP or shared care based on the percentage of patient prescription encounters with NPs versus FPs.

**Results.** By 2015, older patients cared for by NPs were female (59%) and residents of low-income neighbourhoods (44%) living outside of central Ontario. In contrast, patients cared for by FPs were older and residents of higher income and urban areas. Elixhauser comorbidity scores were consistently lower among patients cared for by NPs than those predominantly seen by FPs. Most prevalent conditions were hypertension and diabetes, regardless of provider.

**Interpretation.** Patient comorbidities did not vary substantially between provider groups. The patient characteristic with highest variability between providers was geographical residence in the province. Elucidating patterns of care is critical for primary care policy; our results provide baseline data for future healthcare planning.

Word count: 249

## SOCIODEMOGRAPHIC PROFILE OF OLDER ADULTS

**INTRODUCTION**

Integrated, patient-centered care is a central tenant within Ontario's primary healthcare system.<sup>1</sup> One proposed mechanism to achieve integrated patient-centered care is the introduction of nurse practitioners (NPs) into various primary healthcare models.<sup>1-4</sup> In Ontario, NPs practice at an advanced level, are educated in graduate schools, typically work within an interdisciplinary team, and are prepared to assess, diagnose and manage patient conditions that present in primary, long-term, and tertiary care settings.<sup>5-6</sup> In 2018, 3,442 NPs were registered to practice in Ontario, with 75% working in primary care,<sup>7</sup> and constituted over half of all licensed Canadian NPs.<sup>8</sup>

Numerous studies over the past forty years have ascertained the safety of NP practice, most often comparing equivalencies between NPs and their physician counterparts.<sup>9-14</sup> Recent effectiveness studies have examined NP practice in primary care,<sup>15-17</sup> tertiary care,<sup>18-20</sup> and specialized settings, including care of rural frail elderly clients<sup>21</sup>, those with diabetes<sup>22</sup> and dementia.<sup>23</sup> While there is a large body of knowledge on the safety, effectiveness and role development of NP practice,<sup>24-30</sup> minimal information is available on Ontario patients cared for by NPs, a gap we identified in our previous work.<sup>31</sup> Recent evidence regarding NP practice in Ontario is emerging. In 2012, the Centre for Rural and Northern Health Research (CRaNHR) in Sudbury, Ontario, gathered information on NP client populations using a comprehensive survey and reported that the majority of Ontario NPs' clientele were adults (42%) and seniors (32%).<sup>32</sup> While the sampling frame included all practicing NPs, only 48% (n=693) responded. Using Ontario Nurse Practitioner Access Reporting (NPAR) pilot project data,<sup>33</sup> Heale and colleagues recently reported NP encounter data from 34 family health teams (FHTs) in 2014/2015, linked with other provincial administrative databases.<sup>34</sup> They found NPs saw a wide range of acute

## SOCIODEMOGRAPHIC PROFILE OF OLDER ADULTS

(22%) and chronic (20%) conditions, with hypertension as the most common comorbidity, followed by asthma. The authors acknowledge that only 2.9% of all Ontario primary healthcare NPs were represented. Despite these advances, a poor understanding of population-level characteristics of patient encounters with NPs remains, including geographical variation and trends in population characteristics. To address this knowledge gap, we used Ontario administrative health databases to identify and categorize the clinical and sociodemographic profile of patients 65 years and older cared for by Ontario NPs and family physicians (FPs) between 2000 and 2015.

**METHODS*****Study Design and Data Sources***

This was a population-based, retrospective cohort study that described the characteristics of patients over 65 years or older cared for by NPs and FPs in Ontario, Canada. The Corporate Provider Database (CPDB), derived from the lists of health care professionals registered with each respective licensing college, was used to obtain practice information as well as a prescriber ID for NPs and physicians with an Ontario Health Insurance Plan (OHIP) billing number; and the ICES Physician Database (IPDB) was used to identify FPs through a physician's main specialty. The prescriber IDs of the identified NPs and FPs were used to link to prescriptions dispensed to older adults ( $\geq 65$  years) covered under Ontario's Drug Benefit program (ODB), which contains detailed information on all outpatient prescriptions covered by the provincial drug formulary. Linkage to the Registered Persons Database (RPDB) provided us with basic demographic information for all residents who had ever received an OHIP number. These databases were linked using unique encoded identifiers (Figure 1) and analyzed at ICES. The study was approved by the Research Ethics Board of Queen's University in Kingston, Ontario.



## SOCIODEMOGRAPHIC PROFILE OF OLDER ADULTS

***Study Population***

The study included Ontario residents who were  $\geq 65$  years of age with a valid ICES key number; alive and eligible for health care; and who had at least one prescription by a NP or FP dispensed in each year over the study period from Jan. 1, 2000 to Dec. 31, 2015. Each prescription dispensation date with the same provider was counted as one encounter. Total number of encounters with NPs and FPs were calculated for each patient in each study year. Patients within each study year were assigned to one of three care provider groups (NP, FP, and shared care group) based on the percentage of his or her encounters with NPs versus FPs. Within each study year, patients who had more than 70% of their encounters with NPs were attributed to the NP care group, and patients who had more than 70% of their encounters with FPs were attributed to the FP care group. Those with less than 70% of their encounters with either group were attributed to the shared care group. The 70% cut-off was determined based on the distribution of NP and FP encounters in each study year and the existing literature.<sup>27</sup>

***Patient Characteristics***

Patient characteristics including age, sex, geographic region of residence, neighbourhood income quintile, rurality of residence, marginalization index, and comorbidity were described by provider care groups within each study year. Age was defined at first dispensation date in each year. Geographic region of residence at the first dispensation date was described at the level of the 14 Local Health Integration Networks (LHIN) in Ontario.<sup>35</sup> Neighbourhood income quintiles were based on the average household income in a neighbourhood census tract and ranked into five ascending categories, with the lowest quintile representing the least affluent neighbourhoods.<sup>36</sup> Rurality was measured using the Rurality Index for Ontario 2008, with a score less than 40 being urban.<sup>37</sup> The Ontario Marginalization Index is a geographically based

## SOCIODEMOGRAPHIC PROFILE OF OLDER ADULTS

1  
2  
3 index developed to quantify the degree of marginalization occurring across the province, with a  
4  
5 quintile of five reflecting the greatest magnitude of marginalization.<sup>38</sup> It is comprised of four  
6  
7 major dimensions thought to underlie the construct of marginalization: residential instability,  
8  
9 material deprivation, dependency and ethnic concentration. Comorbidity was classified using the  
10  
11 Elixhauser Comorbidity Index, a measurement score that includes 30 co-existing conditions,  
12  
13 based on the International Classification of Diseases (ICD) diagnosis codes found in the hospital  
14  
15 abstracts data (CIHI-DAD) and in the medical services (OHIP) data within 2 years prior to first  
16  
17 dispensation date.<sup>39-40</sup>  
18  
19  
20

**Analysis**

21  
22  
23  
24 Patients in each of the provider groups were described per year with respect to the  
25  
26 number of encounters and sociodemographic characteristics. To examine geographic variation in  
27  
28 the pattern of encounters, we mapped the proportion of patients cared for by each provider group  
29  
30 within each of Ontario's 14 health regions by study year. The proportion of patients with each  
31  
32 Elixhauser comorbid condition within each provider group per study year were generated and  
33  
34 ranked to identify the five most common comorbid conditions by provider group. All analyses  
35  
36 were performed using SAS<sup>®</sup> version 9.4 (SAS Institute, Cary, NC).  
37  
38  
39

**RESULTS**

40  
41  
42 Over the 15 years, the total number of NPs who prescribed to patients 65 and older  
43  
44 increased by 2439 from 340 in 2000, whereas an additional 3514 FPs prescribed to older adults  
45  
46 from the baseline of 10,201 FPs in 2000. The numbers of NPs and FPs who prescribed to older  
47  
48 adults over the study period are presented in Table 1. Both provider groups experienced an  
49  
50 increase in the provider-to-patient ratio over time. In 2010, over 99% of patients were assigned  
51  
52 to FP care; by 2015, the relative number of patients who received more than 70% of care from  
53  
54  
55  
56  
57  
58  
59  
60

## SOCIODEMOGRAPHIC PROFILE OF OLDER ADULTS

FPs had dropped to 97%, with patients assigned to shared care, followed by NP care at slightly over 1% each (data not shown).

***Clinical and Sociodemographic Profile***

By 2010, nearly 41% of older adults receiving care from NPs, compared to FPs (30.4%) and those in shared practice (35.2%), were between the ages 65 to 69 (Table 2). Interestingly, the highest proportion of those 85 years old and older (16.5%) were cared for by shared care providers in 2015. Female patients consistently were more likely to receive care from either NPs or shared care practices. During the study period, proportionately more older patients living in low income quintile neighbourhoods were cared for by NPs or shared care compared to their FP counterparts; however, the mean marginalization index was intermediate for all patients, regardless of provider group across the study timeframe. Most patients who lived in rural areas of Ontario in 2005 received shared care (~51%), followed by care from a NP (~30%). By 2010, this had changed, as 47% of those assigned to NPs were rural residents, and 41% of shared care prescription encounters were with rural patients. These proportions dropped in 2015 with the percentage of care by NPs to rural residents at 37%, and 28% among shared care providers. The proportion of rural patients seen predominately by FPs was consistently around 14%. In sum, by 2015, older patients cared for by NPs were typically between 65-69 years of age (40%), female (59%), residents of neighbourhoods in the lowest two income quintiles (44%), and living in rural Ontario (37%) (Table 2).

The provincial LHIN geographical distributions of older adults by provider groups in 2005 and 2015 are depicted in Figure 2. In 2005, the total numbers of NP encounters were small, but of these patients, the highest proportions (depicted in red) resided in the South West LHIN (37%) and the North East LHIN (14%). By 2015, the proportion of older patient

## SOCIODEMOGRAPHIC PROFILE OF OLDER ADULTS

encounters by NPs in the South West region had dropped (12%), with the highest proportion of encounters in the North East LHIN (21%). For FPs in 2005, the greatest proportion of older patient encounters were in the Hamilton Niagara Haldimand Brant LHIN (~13%), followed by the Central East (~12%) and Central (11%) regions. The distribution of older patient encounters by FPs did not change appreciably between 2005 and 2015. The distribution of older patients cared for by shared care providers in 2005 was highest in the North East (23%) and in the Central East LHIN (13%). In 2015, older adult encounters for shared care providers were highest in the following LHINs: North East (~14%); Hamilton Niagara Haldimand Brant (12%); South East (10%); and, South West (10%). See Table 2 for data on all LHINs.

The mean prescription encounters per patient for FPs rose slightly over the study duration (Figure 3). After the establishment of FHTs in 2005, the mean patient encounters for NP and shared care practice began to increase. For shared practice providers, the mean number of encounters per patient were similar to that of FPs by 2015. The mean number of NP encounters per patient increased from 1.4 to 10.9 between 2000-2015.

Uncomplicated hypertension was the number one comorbidity of older patients across the entire study time span, regardless of provider group, followed by diabetes mellitus (data not shown). A total of seven conditions were the top five patient comorbidities in this population over the 15 years: hypertension; diabetes; depression; cardiac arrhythmias; solid tumours; chronic pulmonary disease; and, congestive heart failure. The Elixhauser Comorbidity Index scores were relatively low for patients who primarily had NP encounters (Figure 4). Conversely, but not unexpectedly, the comorbidity index of patients who had shared providers consistently increased, and by 2015, was similar to that of patients seen predominately by FPs.

## SOCIODEMOGRAPHIC PROFILE OF OLDER ADULTS

**DISCUSSION**

During the 15-year study period, NP prescription encounters with Ontario residents over the age of 65 increased; the low mean patient prescription encounters by NPs in the early 2000's partially reflects the restrictive provincial formulary list in place until 2011.<sup>31</sup> Overall, higher proportions of patients with NP encounters occurred within shared, inter-disciplinary care. Two previous Ontario studies that classified primary care encounters similarly reported higher proportions of shared care in community health clinics (CHCs)<sup>27</sup> at 18% and in FHTs<sup>34</sup> at nearly 7%, in comparison to our finding of slightly more than 1%. This is not unexpected, as our study incorporated all practice types and was restricted to patients 65 years and older. Similar to our findings, patients cared for by NPs in the United States (U.S.) were more likely to be female<sup>41-43</sup> and to reside in rural or underserved areas.<sup>22, 41-44</sup> Contrary to findings from Ontario CHCs<sup>27</sup> and the U.S.,<sup>43</sup> where higher proportions of patients of all ages cared for by NPs were reported as marginalized, we did not find variation in the marginalization index of older adults across provider groups.

It is reassuring to observe that patients who were primarily cared for by NPs had relatively low comorbidity index scores. Appropriately, the comorbidity index of those patients with shared care by NPs and FPs gradually rose over time to approximate the patient scores of those seen primarily by FPs. Comparable comorbidity findings of older adults are reported in the U.S. In a longitudinal study of Medicare data from 2007 to 2010, diabetic patients receiving care from NPs had a significantly lower Elixhauser Comorbidity Index ( $p < 0.0001$ ) than those cared for by generalist physicians.<sup>42</sup> Similarly, in a cross-sectional study of Medicare data from 2008, patients cared for by NPs had a slightly lower Elixhauser score ( $p < 0.05$ ) than patients cared for by physicians.<sup>22</sup> Finally, our findings parallel chronic disease comorbidity gradients found in the

## SOCIODEMOGRAPHIC PROFILE OF OLDER ADULTS

1  
2  
3 Ontario NPAR data with reported highest comorbidities among patients in the FP group,  
4  
5 intermediate for shared practice and lowest amongst patients receiving care predominately from  
6  
7 NPs.<sup>34</sup>  
8  
9

10 NP encounters consistently were highest in the remote, northeast region of Ontario over  
11  
12 the 15 years. The geographical variation found in the distribution of care for older adults among  
13  
14 provider groups corresponds to that of other Ontario investigations.<sup>31, 45-46</sup> NPs were introduced  
15  
16 into the Canadian healthcare system to address lack of access to services, often in underserved  
17  
18 populations.<sup>47</sup> While the findings support that NPs are providing valuable services to older adults  
19  
20 in more rural and remote areas of the province, the geographical variation raises ongoing  
21  
22 concerns about equity and access to care.<sup>46,48</sup>  
23  
24  
25

26 Caveats regarding the limitations of the study are critical to acknowledge. Patient  
27  
28 encounters that did not involve a prescription were not captured, as NP encounter data is not  
29  
30 routinely collected in Ontario health administrative data. Using the first prescription of a study  
31  
32 year to identify a patient encounter may have introduced bias. We sought to overcome this by  
33  
34 tallying each patient's encounters per study year and then determining the proportion of care  
35  
36 provided by either a FP or NP. While we could not determine whether a NP was working in  
37  
38 primary care or other settings, the likelihood that patient comorbidity data was skewed is  
39  
40 unlikely, as the vast majority of NPs in Ontario work in primary care settings and outpatient  
41  
42 prescription data was used.  
43  
44  
45

46 The NP role within primary healthcare teams has occurred in response to provincial  
47  
48 support and educational investment. Yet, questions remain about the overall dispersion and  
49  
50 impact of NPs within Ontario's healthcare system. Others have highlighted that full contribution  
51  
52 to primary care by NPs may be lacking due to misunderstanding of the role or diminished  
53  
54  
55  
56  
57  
58  
59  
60

## SOCIODEMOGRAPHIC PROFILE OF OLDER ADULTS

1  
2  
3 organizational support.<sup>34,49</sup> Ascertaining the right mix of providers and successful models of care  
4  
5 that fully utilize all team members to provide complementary, comprehensive services, without  
6  
7 duplication, has yet to be determined. Our ability to determine the impact of NPs and other  
8  
9 health care professionals within the team is limited due to the lack of encounter data. Going  
10  
11 forward, imputing accurate patient-level encounter codes for all healthcare providers through  
12  
13 electronic medical records (EMRs) would assist in quantifying the effect of NP care<sup>34</sup> and  
14  
15 provincial administrative databases require better provider indicators to overcome issues of  
16  
17 “shadow billing” by NPs that obscure practice activities.<sup>34,42-43,49</sup> In conclusion, our findings  
18  
19 describe a population profile of patients 65 and older in Ontario receiving care from NPs. This  
20  
21 knowledge provides further evidence for the planning of primary care services and the  
22  
23 optimization of health professional roles within different models of care.  
24  
25  
26  
27

28 Word Count: 2550  
29  
30  
31  
32  
33  
34  
35  
36  
37

**Acknowledgement:**

38 This study was supported by ICES, which is funded by an annual grant from the Ontario  
39 Ministry of Health and Long-Term Care (MOHLTC). The opinions, results and conclusions  
40 reported in this paper are those of the authors and are independent from the funding sources. No  
41 endorsement by ICES or the Ontario MOHLTC is intended or should be inferred.  
42  
43

44 Parts of this material are based on data and/or information compiled and provided by  
45 CIHI. However, the analyses, conclusions, opinions and statements expressed in the material are  
46 those of the author(s), and not necessarily those of CIHI.  
47

48 We thank IMS Brogan Inc. for use of their Drug Information Database.  
49  
50  
51  
52  
53  
54  
55  
56  
57  
58  
59  
60

## SOCIODEMOGRAPHIC PROFILE OF OLDER ADULTS

**References**

1. Ministry of Health and Long-term Care. Patients first. A proposal to strengthen patient-centred health care in Ontario. Toronto: Ontario MOHLTC; 2015. 24 p. Available from: [http://www.health.gov.on.ca/en/news/bulletin/2015/hb\\_20151217.aspx](http://www.health.gov.on.ca/en/news/bulletin/2015/hb_20151217.aspx)
2. Archibald MM, Fraser K. The potential for nurse practitioners in health care reform. *J Prof Nurs.* 2013; 29: 270-5.
3. Brassat-Latulippe A, Verma J, Mulvale G, Barclay K. Provincial and territorial health system priorities: an environmental scan. Ottawa: Canadian Health Services Research Foundation; 2011. Available from: <http://www.cfhi-fcass.ca/SearchResultsNews/11-12-17/bd8952c0-befd-415b-88d8-fa4e3991d97f.aspx>
4. Edwards N, Rowan M, Marck P, Grinspun D. Understanding whole systems change in health care: the case of nurse practitioners in Canada. *Policy Polit Nurs Pract.* 2011; 12(1): 4-17.
5. Nurse Practitioners' Association of Ontario (NPAO). *What is a nurse practitioner?* Toronto: NPAO; 2017. Available from: <https://npao.org/nurse-practitioners/overview/>
6. Little L, Reichert C. Fulfilling nurse practitioners' untapped potential in Canada's health care system: Results from the CFNU Pan-Canadian Nurse Practitioner Retention & Recruitment Study. Ottawa: CFNU; 2018. Available from:
7. College of Nurses of Ontario (CNO). Membership totals at a glance. Toronto: CNO; 2018. Available from: <http://www.cno.org/en/what-is-cno/nursing-demographics/membership-totals-at-a-glance/>
8. Canadian Institute for Health Information. Regulated nurses, 2014: RN/NP data tables. Ottawa: CIHI; 2016. Available from: <https://www.cihi.ca/en/access-data-reports/results?query=nurse+practitioner&Search+Submit=>
9. Chambers LW, West AE. The St John's randomized trial of the family practice nurse: health outcomes of patients. *Int J Epidemiol.* 1978;7(2):153-161.
10. Spitzer WO, Sackett DL, Sibley JC, Roberts RS, Gent M, Kergin DJ, et al. The Burlington randomized trial of the nurse practitioner. *N Eng J Med.* 1974; 290(5): 251-6.
11. Brown SA, Grimes DE. A meta-analysis of nurse practitioners and midwives in primary care. *Nurs Res.* 1995; 44(6): 332-9.
12. Horrocks S, Anderson E, Salisbury C. Systematic review of whether nurse practitioners working in primary care can provide equivalent care to doctors. *BMJ.* 2002; 324: 819-23.



## SOCIODEMOGRAPHIC PROFILE OF OLDER ADULTS

13. Way D, Jones L, Baskerville B, Busing N. Primary health care services provided by nurse practitioners and family physicians in shared practice. *CMAJ*. 2001; 165(9): 1210-14.
14. Solomon DH, Fraenkel L, Lu B, Brown E, Tsao P, Losina E, et al. Comparison of care provided in practices with nurse practitioners and physician assistants versus subspecialist physicians only: A cohort study of rheumatoid arthritis. *Arthritis Care Res*. 2015; 67(12): 1667-70.
15. Health Quality Ontario. Specialized nursing practice for chronic disease management in the primary care setting: an evidence-based analysis. *Ont Health Technol Assess Ser*. 2013; 13(10): 1-66.
16. Oliver GM, Pennington L, Reville S, Rantz M. Impact of nurse practitioners on health outcomes of Medicare and Medicaid patients. *Nurs Outlook*. 2014; 62(6): 440-7.
17. Tenuissen DT, Stegeman MM, Bor HH, Lagro-Janssen TA. Treatment by a nurse practitioner in primary care improves the severity and impact of urinary incontinence in women. An observational study. *BMC Urol*. 2015; 15(1): 51. Available from: doi: 10.1186/s12894-015-0047-0
18. Goldie CL, Prodan-Bhalla N, Mackay M. Nurse practitioners in postoperative cardiac surgery: are they effective? *Can J Cardiovasc Nurs*. 2012; 22(4): 8-15.
19. Hall MH, Esposito RA, Pekmezaris R, Lesser M, Moravick D, Jahn L, et al. Cardiac surgery nurse practitioner home visits prevent coronary artery bypass graft readmissions. *Ann Thorac Surg*. 2014; 97(5): 1488-93.
20. Peeters MJ, van Zuilen AD, van den Brand JA, Bots ML, van Buren M, Ten Dam MA, et al. Nurse practitioner care improves renal outcome in patients with CKD. *J Am Soc Nephrol*. 2014; 25(2): 390-8.
21. Prasad S, Dunn W, Hillier LM, McAinery CA, Warren R, Rutherford P. Rural geriatric glue: a nurse practitioner-led model of care for enhancing primary care for frail older adults within an ecosystem approach. *J Am Geriatr Soc*. 2014; 62(9): 1772-80.
22. Kuo Y-F, Chen N-W, Baillargeon J, Raji MA, Goodwin JS. Potentially preventable hospitalizations in Medicare patients with diabetes. A comparison of primary care provided by nurse practitioners versus physicians. *Med Care*. 2015; 53(9): 776-83.
23. Borbasi S, Emmaneul E, Farelly B, Ashcroft J. A nurse practitioner initiated model of service delivery in caring for people with dementia. *Contemp Nurse*. 2010; 36(1-2): 49-60.
24. Bryant-Lukosius D, DiCenso A, Browne G, Pinelli J. Advanced practice nursing roles: Development, implementation and evaluation. *J Adv Nurs*. 2004; 48(5): 519-29.

## SOCIODEMOGRAPHIC PROFILE OF OLDER ADULTS

- 1  
2  
3  
4  
5  
6  
7  
8  
9  
10  
11  
12  
13  
14  
15  
16  
17  
18  
19  
20  
21  
22  
23  
24  
25  
26  
27  
28  
29  
30  
31  
32  
33  
34  
35  
36  
37  
38  
39  
40  
41  
42  
43  
44  
45  
46  
47  
48  
49  
50  
51  
52  
53  
54  
55  
56  
57  
58  
59  
60
25. Donald F, Bryant-Lukosius R, Martin-Misener R, Kaasalainen S, Kilpatrick K, Carter N, et al. Clinical nurse specialists and nurse practitioners: Title confusion and lack of role clarity. *Nurs Leadersh (Tor Ont)*. 2010; 23(12, Special Issue): 189-210.
  26. Kaasalainen SR, Martin-Misener R, Kilpatrick K, Harbman P, Bryant-Lukosius D, Donald F, et al. A historical overview of the development of the advanced practice nursing roles in Canada. *Nurs Leadersh (Tor Ont)*. 2010; 23(12, Special Issue): 35-60.
  27. Dahrouge S, Muldoon L, Ward N, Hogg W, Russell G, Taylor-Sussex R. The role of nurse practitioners and family physicians in community health centres. *Can Fam Physician*. 2014; 60(11): 1020-7.
  28. Kilpatrick K, Harbman P, Carter N, Martin-Misener R, Bryant-Lukosius D, Donald F, et al. The acute care nurse practitioner role in Canada. *Nurs Leadersh (Tor Ont)*. 2010; 23(12, Special Issue): 114-39.
  29. Kilpatrick K, DiCenso A, Bryant-Lukosius D, Ritchie JA, Martin-Misener R, Carter N. How are acute care nurse practitioners enacting their roles in healthcare teams? A descriptive multiple-case study. *Int J Nurs Stud*. 2012; 49(7): 850-62.
  30. Kapu AN, Kleinpell R. Developing nurse practitioner associated metrics for outcomes assessment. *J Am Assoc Nurse Pract*. 2013; 25(6): 289-96.
  31. Tranmer JE, Colley L, Edge DS, Sears K, VanDenKerkhof E, Levesque L. Trends in nurse practitioners' prescribing to older adults in Ontario, 2000-2010: a retrospective cohort study. *CMAJ Open*. 2015; 3(3), E299-E304.doi:10.9778/cmajo.20150029
  32. Mian O, Lacarte S, Koren I. The NP workforce study: The 2012 survey results. Sudbury, ON: Centre for Rural and Northern Health Research, Laurentian University; 2012. 19 p. Available from:  
[http://documents.cranhr.ca/pdf/CRaNHR\\_2012\\_NP\\_TS\\_survey\\_report\\_November\\_2012.pdf](http://documents.cranhr.ca/pdf/CRaNHR_2012_NP_TS_survey_report_November_2012.pdf)
  33. Strickland S, Woodman M, Moren L, Robertson S. Evaluation of the nurse practitioner access reporting (NPAR) pilot project. Toronto: Ontario Ministry of Health and Long-term Care; 2013. Available from: <https://npao.org/wp-content/uploads/2013/12/NPAR-Final-Evaluation-Report-1.pdf>
  34. Heale R, Dahrouge S, Johnston S, Tranmer JE. Characteristics of nurse practitioner practice in family health teams in Ontario, Canada. *Policy Polit Nurs Pract*. 2018; 19(3-4), 72-81. Available from: doi: 10.1177/1527154418792538

## SOCIODEMOGRAPHIC PROFILE OF OLDER ADULTS

- 1  
2  
3 35. Local Health Integration Network. Ontario's LHINs. Toronto: Queen's Printer for Ontario;  
4 2014. Available from: <http://www.lhins.on.ca>  
5  
6  
7 36. Statistics Canada. 8. Health system indicators (Canadian Institute for Health Information-  
8 CIHI). Publication 82-221-X. Ottawa: Author; 2016. Available from:  
9 <https://www150.statcan.gc.ca/n1/pub/82-221-x/2013001/quality-qualite/qua8-eng.htm>  
10  
11 37. Kralj B. Measuring rurality-RIO2008-BASIC: Methodology and results. Toronto: Ontario  
12 Medical Association; 2009. Available from: [https://www.oma.org/wp-](https://www.oma.org/wp-content/uploads/2008rio-fulltechnicalpaper.pdf)  
13 [content/uploads/2008rio-fulltechnicalpaper.pdf](https://www.oma.org/wp-content/uploads/2008rio-fulltechnicalpaper.pdf)  
14  
15  
16 38. Matheson FI, van Ingen T, Maloney, G. 2016 Ontario Marginalization Index (ON-Marg).  
17 Toronto: Providence St. Joseph's and St. Michael's Healthcare; Joint publication with Public  
18 Health Ontario; 2018. Available from:  
19 <https://www.publichealthontario.ca/en/DataAndAnalytics/Pages/ON-Marg.aspx>  
20  
21  
22 39. Elixhauser A, Steiner C, Harris DR, Coffey RM. Comorbidity measures for use with  
23 administrative data. *Med Care*. 1998; 36(1): 8-27.  
24  
25  
26 40. Quan H, Sundararajan V, Halfon P, Fong A, Burnand B, Luthi J-C, et al. (2005) Coding  
27 algorithms for defining comorbidities in ICD-9-CM and ICD-10 administrative data. *Med*  
28 *Care*. 2005; 43(11),1130-9.  
29  
30  
31 41. Jiao S, Murimi, IB, Stafford RS, Mojtabei R, Alexander GC. Quality of prescribing by  
32 physicians, nurse practitioners, and physician assistants in the United States.  
33 *Pharmacotherapy*. 2018; 38(4), 417-27. Available from: doi: 10.1002/phar.2095  
34  
35  
36 42. DesRoches CM, Gaudet J, Perloff J, Donelan K, Lezzoni LI, Buerhaus P. Using Medicare  
37 data to assess nurse practitioner-provided care. *Nurs Outlook*. 2013; 61(6): 400-7. Available  
38 from: doi:10.1016/j.outlook.2013.05.005  
39  
40  
41 43. Buerhaus PI, DesRoches CM, Dittus R, Donelan K. Practice characteristics of primary care  
42 nurse practitioners and physicians. *Nurs Outlook*. 2015; 63(2): 144-53. Available from: doi:  
43 10.1016/j.outlook.2014.08.008  
44  
45  
46 44. Grumbach K, Hart LG, Mertz E, Coffman J, Palazzo L. Who is caring for the underserved?  
47 A comparison of primary care physicians and nonphysician clinicians in California and  
48 Washington. *Ann Fam Med*. 2003; 1(2), 97-104. Available from: doi: 10.1370/afm.49.  
49  
50  
51 45. Green ME, Gozdyra P, Frymire E, Glazier RH. Geographic variation in the supply and  
52 distribution of comprehensive primary care physicians in Ontario, 2014/15. Toronto, ON:  
53 Institute for Clinical Evaluative Sciences; 2017. Available from:  
54 [https://www.ices.on.ca/Publications/Atlases-and-Reports/2017/Geographic-variation-in-](https://www.ices.on.ca/Publications/Atlases-and-Reports/2017/Geographic-variation-in-physician-supply)  
55 [physician-supply](https://www.ices.on.ca/Publications/Atlases-and-Reports/2017/Geographic-variation-in-physician-supply)  
56  
57  
58  
59  
60

## SOCIODEMOGRAPHIC PROFILE OF OLDER ADULTS

- 1  
2  
3  
4  
5  
6  
7  
8  
9  
10  
11  
12  
13  
14  
15  
16  
17  
18  
19  
20  
21  
22  
23  
24  
25  
26  
27  
28  
29  
30  
31  
32  
33  
34  
35  
36  
37  
38  
39  
40  
41  
42  
43  
44  
45  
46  
47  
48  
49  
50  
51  
52  
53  
54  
55  
56  
57  
58  
59  
60
46. Glazier RH, Gozdyra P, Kim M, Bai L, Kopp A, Schultz SE, et al. Geographic variation in primary care need, service use and providers in Ontario, 2015/16. Toronto, ON: Institute for Clinical Evaluative Sciences; 2018. Available from: <https://www.ices.on.ca/Publications/Atlases-and-Reports/2018/Geographic-Variation-in-Primary-Care>
47. Staples E, Ray SL. A historical overview of advanced practice nursing in Canada. In: Staples E, Ray SL, Hannon RA, editors. Canadian perspectives on advanced practice nursing. Toronto: Canadian Scholars Press; 2016. p. 2-22.
48. Health Quality Ontario. Income and health. Opportunities to achieve health equity in Ontario. Toronto: Author; 2016. Available from: <https://www.hqontario.ca/System-Performance/Specialized-Reports/Health-Equity-Report>
49. Poghosyan L, Aikin LH. Maximizing nurse practitioners' contributions to primary care through organizational changes. *J Ambul Care Manage*. 2015; 38(2), 109-17. Available from: doi: 10.1097/JAC.0000000000000054

## SOCIODEMOGRAPHIC PROFILE OF OLDER ADULTS

**Table 1.** Number of nurse practitioners (NPs) and family physicians (FPs) who prescribed to older adults in Ontario between 2000 and 2015

| Year | Number of NPs | Number of patients seen by NPs | Patients/NP ratio | Number of FPs | Number of patients seen by FPs | Patients/FP ratio |
|------|---------------|--------------------------------|-------------------|---------------|--------------------------------|-------------------|
| 2000 | 340           | 240                            | 0.7               | 10201         | 1222981                        | 119.9             |
| 2001 | 389           | 666                            | 1.7               | 10284         | 1246747                        | 121.2             |
| 2002 | 429           | 913                            | 2.1               | 10319         | 1269956                        | 123.1             |
| 2003 | 516           | 894                            | 1.7               | 10511         | 1297025                        | 123.4             |
| 2004 | 572           | 1067                           | 1.9               | 10614         | 1352342                        | 127.4             |
| 2005 | 626           | 2304                           | 3.7               | 10764         | 1401119                        | 130.2             |
| 2006 | 701           | 3741                           | 5.3               | 10818         | 1444228                        | 133.5             |
| 2007 | 862           | 6464                           | 7.5               | 10964         | 1489519                        | 135.9             |
| 2008 | 1023          | 12362                          | 12.1              | 11055         | 1536712                        | 139.0             |
| 2009 | 1259          | 17988                          | 14.3              | 11379         | 1584402                        | 139.2             |
| 2010 | 1432          | 25563                          | 17.9              | 11604         | 1631998                        | 140.6             |
| 2011 | 1651          | 36751                          | 22.3              | 11920         | 1694902                        | 142.2             |
| 2012 | 1934          | 59940                          | 31.0              | 12244         | 1780277                        | 145.4             |
| 2013 | 2151          | 80450                          | 37.4              | 12603         | 1866449                        | 148.1             |
| 2014 | 2438          | 97549                          | 40.0              | 13301         | 1930461                        | 145.1             |
| 2015 | 2779          | 119679                         | 43.1              | 13715         | 1991077                        | 145.2             |

SOCIODEMOGRAPHIC PROFILE OF OLDER ADULTS

**Table 2.** Characteristics of older patients by predominant provider group in 2005, 2010 and 2015

|                                      | 2005          |                    |                 | 2010             |                    |                   | 2015              |                      |                    |
|--------------------------------------|---------------|--------------------|-----------------|------------------|--------------------|-------------------|-------------------|----------------------|--------------------|
| # of Patients                        | NP<br>N=155   | FP<br>N=1,400,846  | Shared<br>N=262 | NP<br>N=3,849    | FP<br>N=1,624,783  | Shared<br>N=5,611 | NP<br>N=25,220    | FP<br>N=1,952,904    | Shared<br>N=28,428 |
| <b>Age, years</b>                    |               |                    |                 |                  |                    |                   |                   |                      |                    |
| 65-69                                | 47<br>(30.3%) | 403,744<br>(28.8%) | 91<br>(34.7%)   | 1,566<br>(40.7%) | 493,855<br>(30.4%) | 1,975<br>(35.2%)  | 10,153<br>(40.3%) | 650,183<br>(33.3%)   | 9,009<br>(31.7%)   |
| 70-74                                | 30<br>(19.4%) | 337,404<br>(24.1%) | 48<br>(18.3%)   | 938<br>(24.4%)   | 365,745<br>(22.5%) | 1,218<br>(21.7%)  | 6,048<br>(24.0%)  | 436,491<br>(22.4%)   | 6,081<br>(21.4%)   |
| 75-79                                | 27<br>(17.4%) | 289,357<br>(20.7%) | 51<br>(19.5%)   | 641<br>(16.7%)   | 312,661<br>(19.2%) | 1,036<br>(18.5%)  | 3,919<br>(15.5%)  | 341,012<br>(17.5%)   | 4,682<br>(16.5%)   |
| 80-84                                | 30<br>(19.4%) | 213,387<br>(15.2%) | 42<br>(16.0%)   | 410<br>(10.7%)   | 238,200<br>(14.7%) | 731<br>(13.0%)    | 2,643<br>(10.5%)  | 260,649<br>(13.3%)   | 3,957<br>(13.9%)   |
| 85+                                  | 21<br>(13.5%) | 156,954<br>(11.2%) | 30<br>(11.5%)   | 294<br>(7.6%)    | 214,322<br>(13.2%) | 651<br>(11.6%)    | 2,457<br>(9.7%)   | 264,569<br>(13.5%)   | 4,699<br>(16.5%)   |
| <b>Sex</b>                           |               |                    |                 |                  |                    |                   |                   |                      |                    |
| Female                               | 94<br>(60.6%) | 811,395<br>(57.9%) | 174<br>(66.4%)  | 2,378<br>(61.8%) | 920,928<br>(56.7%) | 3,500<br>(62.4%)  | 14,941<br>(59.2%) | 1,083,923<br>(55.7%) | 16,944<br>(59.6%)  |
| Male                                 | 61<br>(39.4%) | 589,451<br>(42.1%) | 88<br>(33.6%)   | 1,471<br>(38.2%) | 703,855<br>(43.3%) | 2,111<br>(37.6%)  | 10,278<br>(40.8%) | 868,981<br>(44.5%)   | 11,484<br>(40.4%)  |
| <b>Neighbourhood Income Quintile</b> |               |                    |                 |                  |                    |                   |                   |                      |                    |
| 1-Lowest                             | 45<br>(29.0%) | 289,167<br>(20.6%) | 63<br>(24.0%)   | 883<br>(22.9%)   | 307,740<br>(18.9%) | 1,382<br>(24.6%)  | 5,783<br>(22.9%)  | 347,033<br>(17.8%)   | 6,347<br>(22.3%)   |
| 2                                    | 19<br>(12.3%) | 297,894<br>(21.3%) | 67<br>(25.6%)   | 831<br>(21.6%)   | 332,835<br>(20.5%) | 1,154<br>(20.6%)  | 5,312<br>(21.1%)  | 387,649<br>(19.8%)   | 5,595<br>(19.7%)   |
| 3                                    | 12<br>(7.7%)  | 272,929<br>(19.5%) | 43<br>(16.4%)   | 725<br>(18.8%)   | 321,089<br>(19.8%) | 992<br>(17.7%)    | 4,935<br>(19.6%)  | 387,553<br>(19.8%)   | 5,530<br>(19.5%)   |
| 4                                    | 52<br>(33.5%) | 267,444<br>(19.1%) | 38<br>(14.5%)   | 717<br>(18.6%)   | 327,659<br>(20.2%) | 1,097<br>(19.6%)  | 4,651<br>(18.4%)  | 412,065<br>(21.1%)   | 5,459<br>(19.2%)   |
| 5-Highest                            | 26<br>(16.8%) | 269,312<br>(19.2%) | 51<br>(19.5%)   | 646<br>(16.8%)   | 329,804<br>(20.3%) | 944<br>(16.8%)    | 4,354<br>(17.3%)  | 411,648<br>(21.1%)   | 5,292<br>(18.6%)   |

## SOCIODEMOGRAPHIC PROFILE OF OLDER ADULTS

| Table 2., Cont.                      | 2005           |                      |                 | 2010             |                      |                   | 2015              |                      |                    |
|--------------------------------------|----------------|----------------------|-----------------|------------------|----------------------|-------------------|-------------------|----------------------|--------------------|
| # of Patients                        | NP<br>N=155    | FP<br>N=1,400,846    | Shared<br>N=262 | NP<br>N=3,849    | FP<br>N=1,624,783    | Shared<br>N=5,611 | NP<br>N=25,220    | FP<br>N=1,952,904    | Shared<br>N=28,428 |
| <b>Rurality Index</b>                |                |                      |                 |                  |                      |                   |                   |                      |                    |
| Urban (<40)                          | 108<br>(69.7%) | 1,196,667<br>(85.4%) | 129<br>(49.2%)  | 2,023<br>(52.6%) | 1,396,072<br>(85.9%) | 3,286<br>(58.6%)  | 15,776<br>(62.6%) | 1,689,397<br>(86.5%) | 20,460<br>(72.0%)  |
| Rural (≥40)                          | 46<br>(29.7%)  | 203,693<br>(14.5%)   | 133<br>(50.8%)  | 1,826<br>(47.4%) | 228,688<br>(14.1%)   | 2,325<br>(41.4%)  | 9,443<br>(37.4%)  | 263,469<br>(13.5%)   | 7,966<br>(28.0%)   |
| <b>Ontario Marginalization Index</b> |                |                      |                 |                  |                      |                   |                   |                      |                    |
| Mean (± SD)                          | 3.14<br>(0.71) | 3.22<br>(0.79)       | 3.17<br>(0.74)  | 3.12<br>(0.70)   | 3.16<br>(0.79)       | 3.15<br>(0.75)    | 3.12<br>(0.73)    | 3.11<br>(0.79)       | 3.13<br>(0.76)     |
| Median (IQR)*                        | 3 (3-4)        | 3 (3-4)              | 3 (3-4)         | 3 (3-4)          | 3 (3-4)              | 3 (3-4)           | 3 (3-4)           | 3 (3-4)              | 3 (3-4)            |
| <b>LHINs**<br/>(% of patients)</b>   |                |                      |                 |                  |                      |                   |                   |                      |                    |
| 1                                    | 7.1            | 5.8                  | 11.8            | 7.8              | 5.6                  | 7.5               | 7.6               | 5.4                  | 5.8                |
| 2                                    | 37.4           | 8.4                  | 11.1            | 13.0             | 8.1                  | 11.9              | 11.5              | 7.9                  | 10.1               |
| 3                                    | 6.5            | 5.0                  | 5.7             | 4.8              | 5.0                  | 4.8               | 4.6               | 5.1                  | 5.9                |
| 4                                    | 7.1            | 12.8                 | 9.9             | 5.7              | 12.5                 | 9.9               | 6.8               | 12.1                 | 12.1               |
| 5                                    | 2.6            | 4.1                  | 1.1             | 0.5              | 4.7                  | 0.6               | 1.0               | 5.3                  | 2.3                |
| 6                                    | 0.0            | 6.6                  | 0.4             | 0.9              | 6.9                  | 1.7               | 1.5               | 7.4                  | 3.3                |
| 7                                    | 1.3            | 8.4                  | 0.8             | 1.0              | 7.8                  | 1.0               | 2.2               | 7.5                  | 2.6                |
| 8                                    | 0.6            | 11.4                 | 3.1             | 1.8              | 11.8                 | 2.4               | 2.8               | 12.5                 | 3.6                |
| 9                                    | 4.5            | 11.9                 | 13.4            | 12.3             | 11.9                 | 8.6               | 11.8              | 12.0                 | 9.6                |
| 10                                   | 5.8            | 5.0                  | 8.4             | 12.0             | 4.9                  | 13.0              | 9.6               | 4.7                  | 10.2               |
| 11                                   | 7.7            | 9.0                  | 6.5             | 6.2              | 9.3                  | 6.6               | 6.4               | 9.6                  | 6.0                |
| 12                                   | 3.2            | 3.9                  | 4.2             | 4.3              | 4.0                  | 4.7               | 6.0               | 4.0                  | 7.5                |
| 13                                   | 14.2           | 5.8                  | 23.3            | 25.6             | 5.4                  | 22.7              | 21.3              | 4.9                  | 13.6               |
| 14                                   | 1.9            | 2.0                  | 0.4             | 4.1              | 1.9                  | 4.5               | 6.9               | 1.7                  | 7.5                |

\*IQR = inter-quintile range

\*\* LHINs: 1=Erie St. Clair; 2=South West; 3=Waterloo Wellington; 4=Hamilton Niagara Haldimand Brant; 5=Central West; 6=Mississauga Halton; 7=Toronto Central; 8=Central; 9=Central East; 10=South East; 11=Champlain; 12=North Simcoe Muskoka; 13=North East; 14=North West

## SOCIODEMOGRAPHIC PROFILE OF OLDER ADULTS

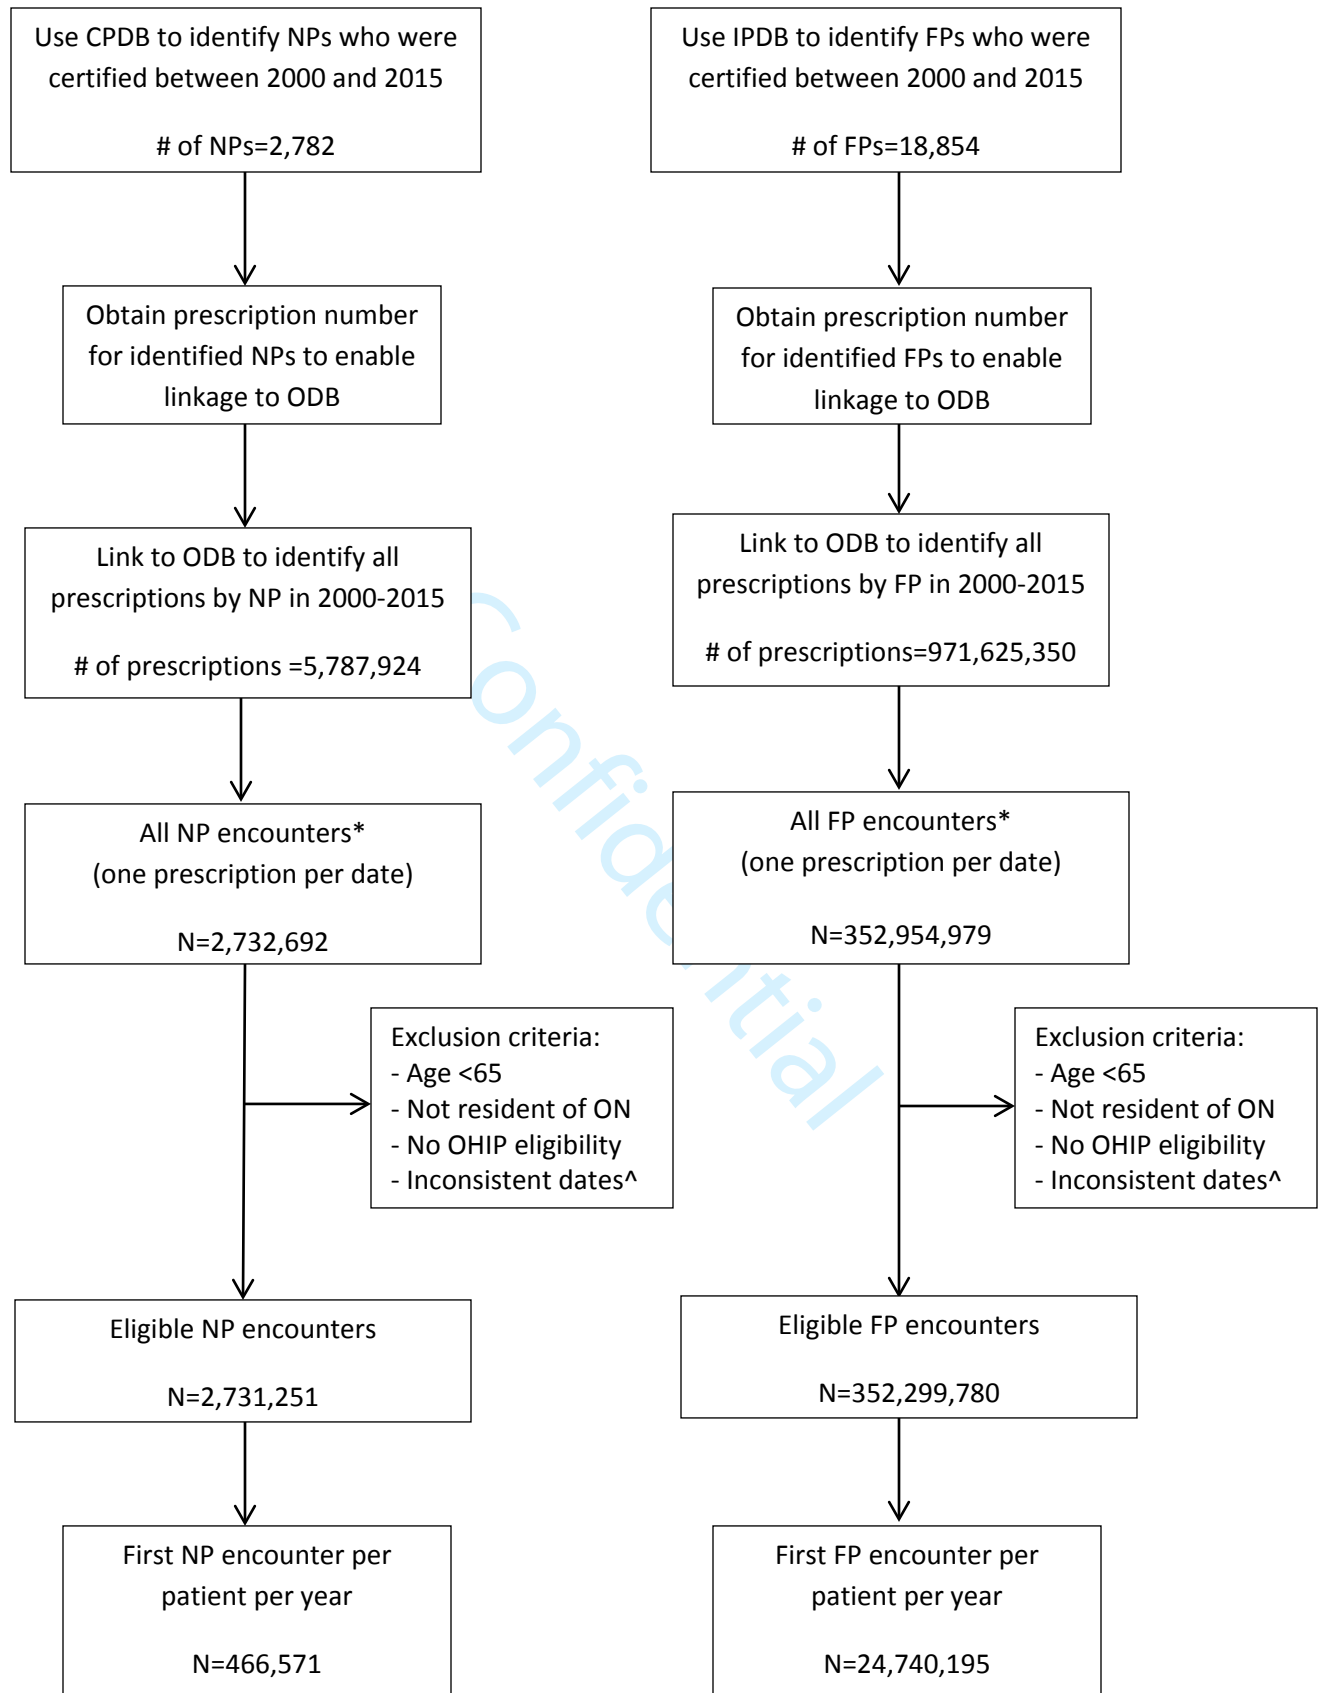

**Figure 1. Flow diagram of cohort identification**

\*Encounter: each dispensing date is counted as one encounter (i.e. multiple prescriptions on the same date are counted as ONE encounter)

For Peer Review Only

^Inconsistent dates: death date comes before dispense date



SOCIODEMOGRAPHIC PROFILE OF OLDER ADULTS

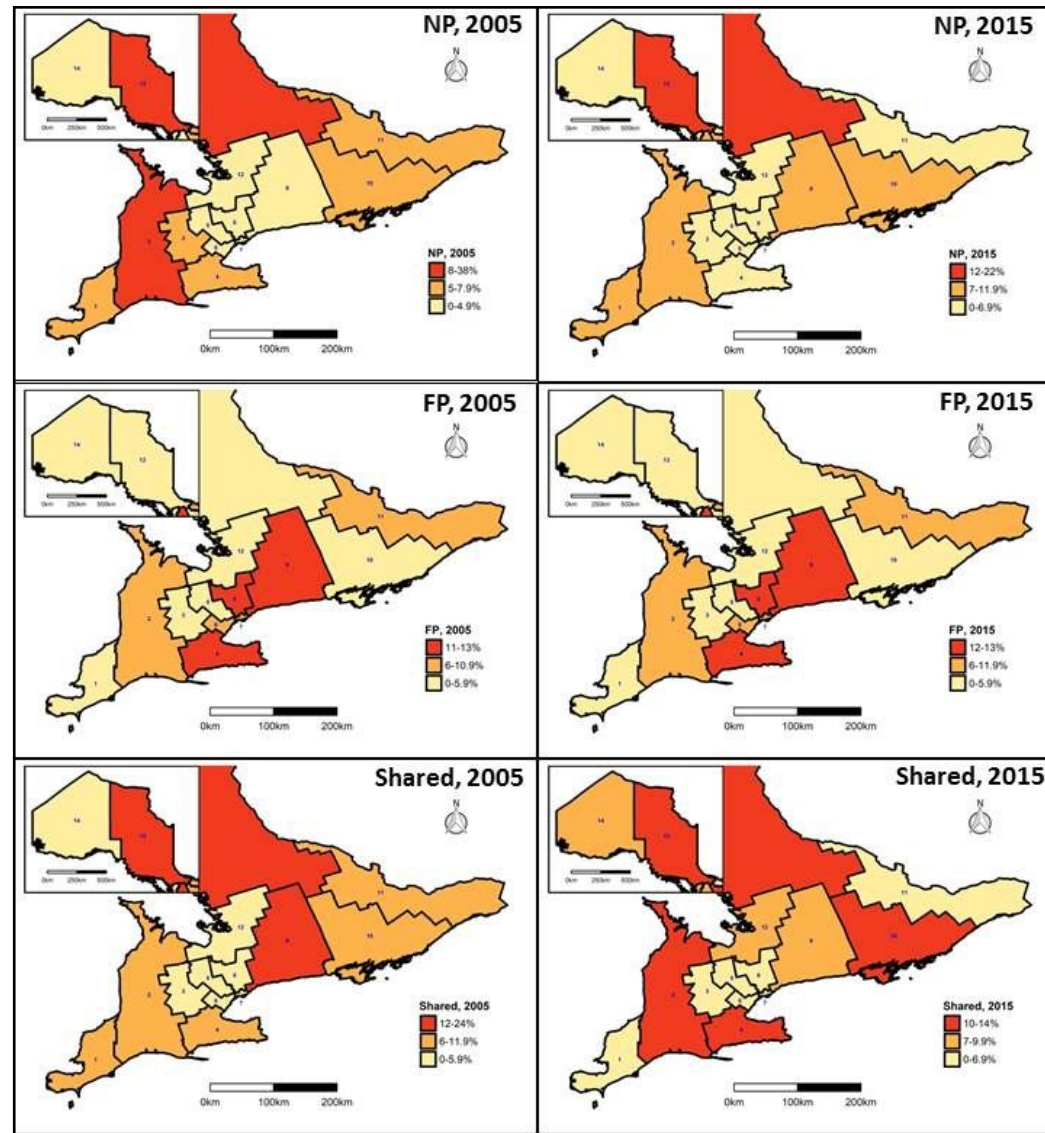

**Figure 2.** Proportion of older patients cared for by provider groups in 2005 and 2015 by LHIN

SOCIODEMOGRAPHIC PROFILE OF OLDER ADULTS

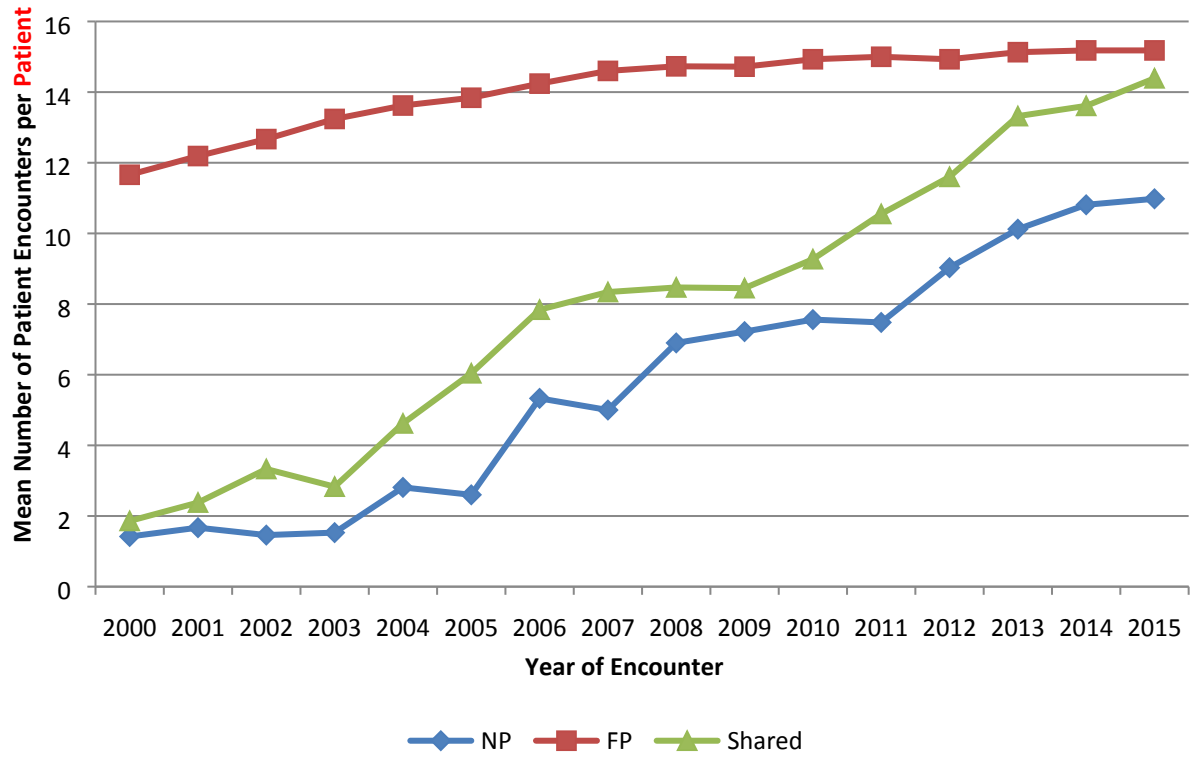

Figure 3. Mean number of patient encounters per patient per year, by provider groups, 2000-2015

## SOCIODEMOGRAPHIC PROFILE OF OLDER ADULTS

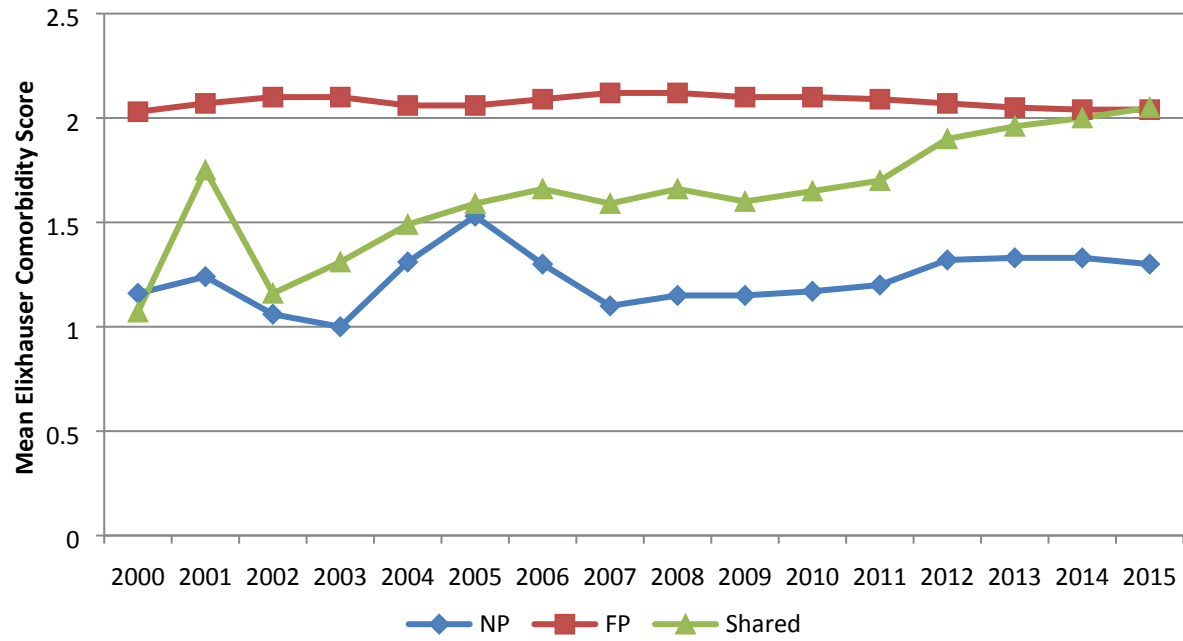

**Figure 4.** Mean Elixhauser Comorbidity Index score per year, by provider group, 2000-2015
